# Supplementary material for: Vulnerability to low-dose combination of irinotecan and niraparib in ATM-mutated colorectal cancer
Source: PubMed Central journal article supplement (PMC7789007; doi:10.1186/s13046-020-01811-8), 2021-01-06
Supplement: 13046_2020_1811_MOESM3_ESM.pdf [file 13046_2020_1811_MOESM3_ESM.pdf]

# Supplementary table 3

| Cell lines     | Genetic alteration<br>BRCA2           | COSMIC<br>MUTATION ID | FATHMM prediction | LOVD<br>reference |
|----------------|---------------------------------------|-----------------------|-------------------|-------------------|
| <b>HCT15</b>   | c.5351dup (p.N1784T fs*7, frameshift) | COSV66448906          | n/a               | Pathogenic        |
|                | c.3599_3600del (p.C1200*, nonsense)   | COSV66458816          | n/a               | Pathogenic        |
|                | c.8351G>A (R2784Q, missense)          | n/a                   | n/a               | VUS               |
|                | c.1460C>T (p.A487V, missense)         | COSV66458810          | 0.05 (neutral)    | n/a               |
| <b>LIM1215</b> | c.7397T>C (p.V2466A, missense)        | COSV66451785          | 0.00 (neutral)    | Benign            |
| <b>SW48</b>    | c.5351dup (p.N1784T fs*7, frameshift) | COSV66448906          | n/a               | Pathogenic        |
|                | c.7397T>C (p.V2466A, missense)        | COSV66451785          | 0.00 (neutral)    | Benign            |
|                | c.5073del (p.K1691Nfs*15, frameshift) | COSV66451438          | n/a               | Pathogenic        |
|                | c.4258G>T (p.D1420Y, missense)        | COSV66451253          | 0.50 (neutral)    | Benign            |
| <b>WIDR</b>    | c.7397T>C (p.V2466A, missense)        | COSV66451785          | 0.00 (neutral)    | Benign            |
| <b>HCT116</b>  | c.8021dup (p.I2675Dfs*6, frameshift)  | COSV66451450          | n/a               | VUS               |
