# Supplementary material for: Vulnerability to low-dose combination of irinotecan and niraparib in ATM-mutated colorectal cancer
Source: Springer Nature journal article supplement (doi:10.1186/s13046-020-01811-8), 2021-01-06
Supplement: MOESM1 [file 18741670]

# Supplementary table 1

|      |                       | HCT15        | LOVO         | LIM1215      | SW48         | SW1116       | LS1034 | SW403  | SW948        | WIDR         | HCT116       | SW480        | CaCo2 |
|------|-----------------------|--------------|--------------|--------------|--------------|--------------|--------|--------|--------------|--------------|--------------|--------------|-------|
| ED50 | Niraparib/5FU         | 0.885        | 0.602        | 0.764        | 0.619        | 0.333        | 8.209  | 6.935  | <b>0.191</b> | 0.390        | 1.334        | 1.521        | 4.431 |
| ED50 | Niraparib/oxaliplatin | 7.311        | <b>0.152</b> | 0.333        | <b>0.487</b> | 0.427        | 1.977  | 1.663  | 16.740       | 0.837        | 0.834        | 0.888        | 3.496 |
| ED50 | Niraparib/SN38        | <b>0.170</b> | <b>0.519</b> | <b>0.067</b> | 3.662        | <b>0.727</b> | 2.615  | 5.362  | <b>0.174</b> | <b>0.025</b> | <b>0.069</b> | <b>0.012</b> | 1.189 |
|      |                       | HCT15        | LOVO         | LIM1215      | SW48         | SW1116       | LS1034 | SW403  | SW948        | WIDR         | HCT116       | SW480        | CaCo2 |
| ED75 | Niraparib/5FU         | 1.168        | 0.571        | 4.876        | 1.352        | 36.891       | 5.108  | 8.858  | <b>0.026</b> | 0.735        | 3.067        | 2.659        | 1.634 |
| ED75 | Niraparib/oxaliplatin | 1.064        | <b>0.047</b> | 2.388        | <b>0.522</b> | 2.950        | 9.122  | 2.441  | 70.568       | 0.788        | 0.412        | 1.255        | 4.110 |
| ED75 | Niraparib/SN38        | <b>0.068</b> | <b>0.287</b> | <b>0.112</b> | 8.862        | 4.288        | 2.724  | 0.878  | <b>0.025</b> | <b>0.297</b> | <b>0.018</b> | <b>0.021</b> | 1.571 |
|      |                       | HCT15        | LOVO         | LIM1215      | SW48         | SW1116       | LS1034 | SW403  | SW948        | WIDR         | HCT116       | SW480        | CaCo2 |
| ED90 | Niraparib/5FU         | 1.716        | 0.692        | 41.093       | 3.186        | 8007.810     | 3.448  | 13.510 | <b>0.004</b> | 4.056        | 8.704        | 4.945        | 0.626 |
| ED90 | Niraparib/oxaliplatin | 0.160        | <b>0.015</b> | 19.205       | <b>0.567</b> | 21.766       | 42.115 | 4.616  | 526.025      | 0.796        | 0.240        | 2.131        | 4.820 |
| ED90 | Niraparib/SN38        | <b>0.028</b> | <b>0.166</b> | <b>0.188</b> | 21.522       | 25.846       | 2.927  | 0.197  | <b>0.004</b> | 3.848        | <b>0.005</b> | <b>0.036</b> | 2.292 |
